# Supplementary material for: White organic light emitting diodes based on a yellow thermally activated delayed fluorescent emitter and blue fluorescent emitter
Source: Royal Society of Chemistry journal article supplement (doi:10.1039/c5ra09168c), 2015-01-01
Supplement: c5ra09168c1.pdf [file c5ra09168c1.pdf]

# Supporting Information

## White Light Emitting Diodes Based on A Yellow Thermally Activated Delayed Fluorescent Emitter and Blue Fluorescent emitter

*Lingqiang Meng,<sup>1,2,3</sup> Hui Wang,<sup>1,2,3</sup> Xiaofang Wei,<sup>1,2,3</sup> Xiaopeng Lv,<sup>4</sup> Ying Wang<sup>1,2,\*</sup> and  
Pengfei Wang<sup>1,2</sup>*

<sup>1</sup>Key Laboratory of Photochemical Conversion and Optoelectronic Materials, Technical Institute of Physics and Chemistry, Chinese Academy of Sciences, Beijing, 100190, China; <sup>2</sup>Key Laboratory of Photochemical Conversion and Optoelectronic Materials and CityU-CAS Joint Laboratory of Functional Materials and Devices, Technical Institute of Physics and Chemistry, Chinese Academy of Sciences, Beijing, 100190, China; <sup>3</sup>University of Chinese Academy of Sciences, Beijing, 100049, China; <sup>4</sup>Soochow University, Jiangsu Province, China

E-mail: wangy@mail.ipc.ac.cn

KEYWORDS: white light-emitting diodes, thermally activated delayed fluorescence, efficiency roll-off, external quantum efficiency

### Experimental Methods

**Materials.** TXO-TPA was synthesized as reported previously. The hole-injection materials of poly(styrene sulfonic acid)-doped poly(3,4-ethylenedioxythiophene) (PEDOT:PSS, Baytron PVP A4083) was purchased from H.C. Starck GmbH. The hole transporting material of 1,1-bis[(di-4-tolylamino)phenyl] cyclohexane (TAPC), the electron-transporting materials of 1,3-bis[(4-tert-butylphenyl)-benzene (TmPyPB), the blue fluorescent emitter of N,N'-di-1-naphthalenyl-N,N'-diphenyl-[1,1':4',1'':4'',1''']-

quaterphenyl]-4,4''-diamine (4P-NPB) and the host material of 1,3-Bis(carbazol-9-yl)benzene (mCP) was purchased from Jilin Optical and Electronic Materials Company, which were purified by repeated temperature-gradient vacuum sublimation and received with a purity of more than 99%. LiF was purchased from Sigma-Aldrich.

**Device Fabrication.** OLEDs were fabricated on patterned ITO-coated glass substrates with a sheet resistance of  $15 \Omega/\square$ . Before device fabrication, the ITO glass substrates were ultrasonically cleaned with detergent, de-ionized water, acetone, and alcohol. After that, the substrates were dried in an oven at  $120^\circ\text{C}$  and then treated with UV-ozone for 10 mins. A layer of 30 nm thick PEDOT:PSS was spin-coated onto the precleaned substrate and bake in a glovebox under a nitrogen environment (oxygen and water contents less than 1 ppm) at  $120^\circ\text{C}$  for 30 mins to extract residual water. Afterward, the substrates transferred to a vacuum deposition system with a base pressure better than  $1 \times 10^{-6}$  mbar for organic semiconductor layers and metal deposition. The devices were fabricated by evaporating organic semiconductors onto the PEDOT:PSS layer sequentially with an evaporation rate of  $1\text{--}2 \text{ \AA/s}$ . The cathode was completed through thermal deposition of LiF at a deposition rate of  $0.1 \text{ \AA/s}$ , and then capped with Al metal through thermal evaporation at a rate of  $10 \text{ \AA/s}$ .

**Measurements.** UV-vis spectra and fluorescence spectra were obtained with Hitachi U-3900 and F-4600 spectrophotometers, respectively. The thickness of evaporated films were monitored by frequency counter, and calibrated by Dektak 6M Profiler. The EL luminescence spectra and CIE color coordinates were measured by a Spectrascan PR655

photometer. The current-voltage-brightness characteristics were measured by using a computer-controlled Keithley source measurement unit (Keithley 2400 SourceMeter) with a calibrated optical power meter of Newport company (1936R) under ambient atmosphere.
